# Supplementary material for: Activation of GPER1 in macrophages ameliorates UUO-induced renal fibrosis
Source: PubMed Central journal article supplement (PMC10716282; doi:10.1038/s41419-023-06338-2), 2023-12-12

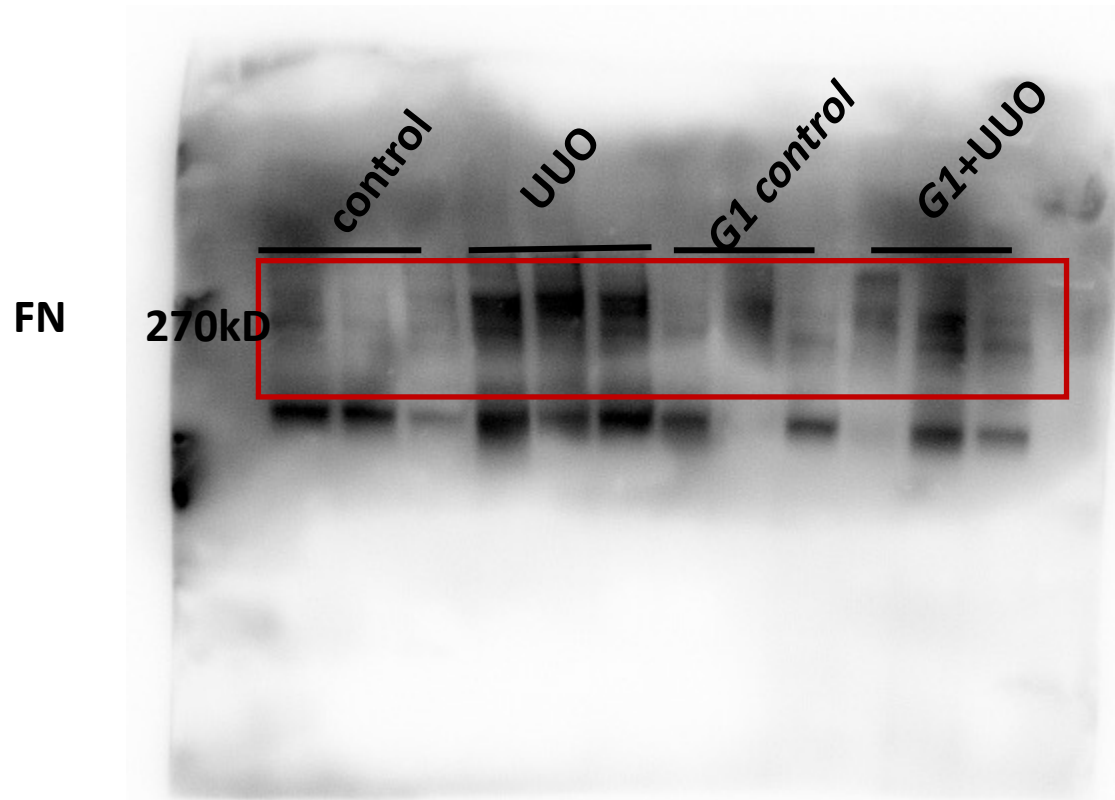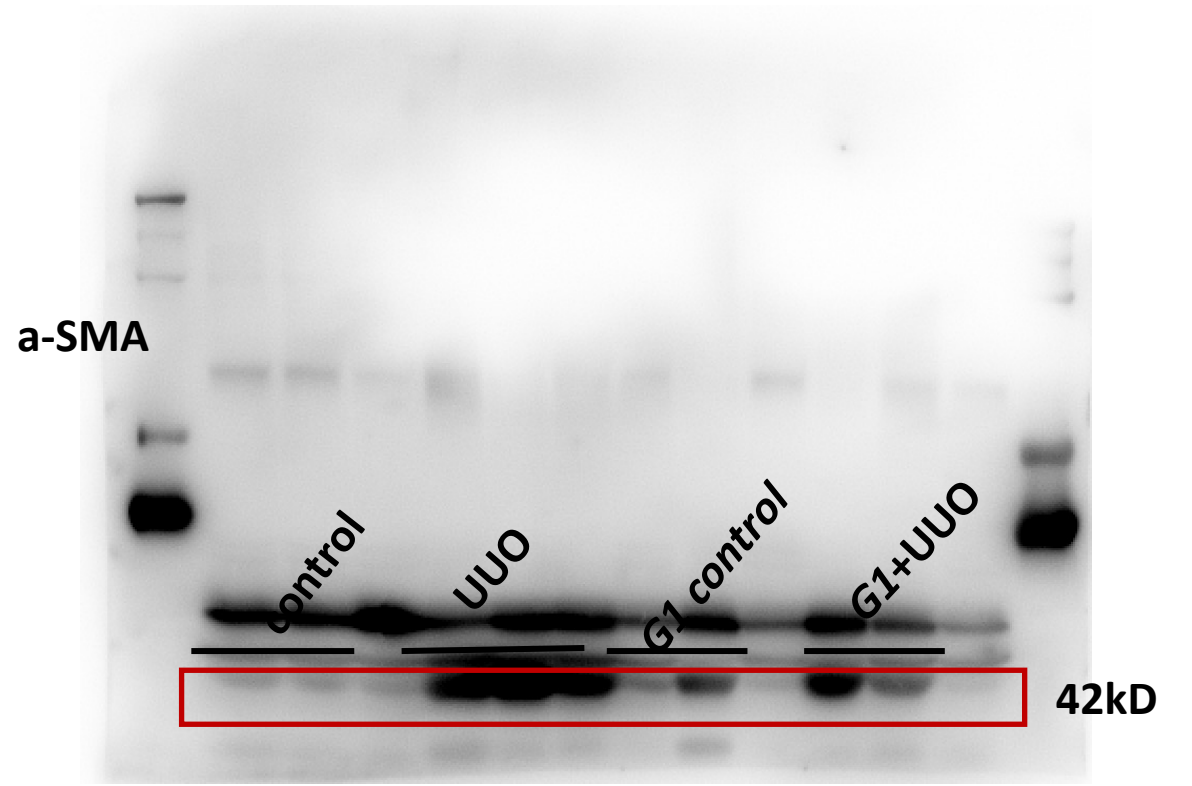

OVX female mice

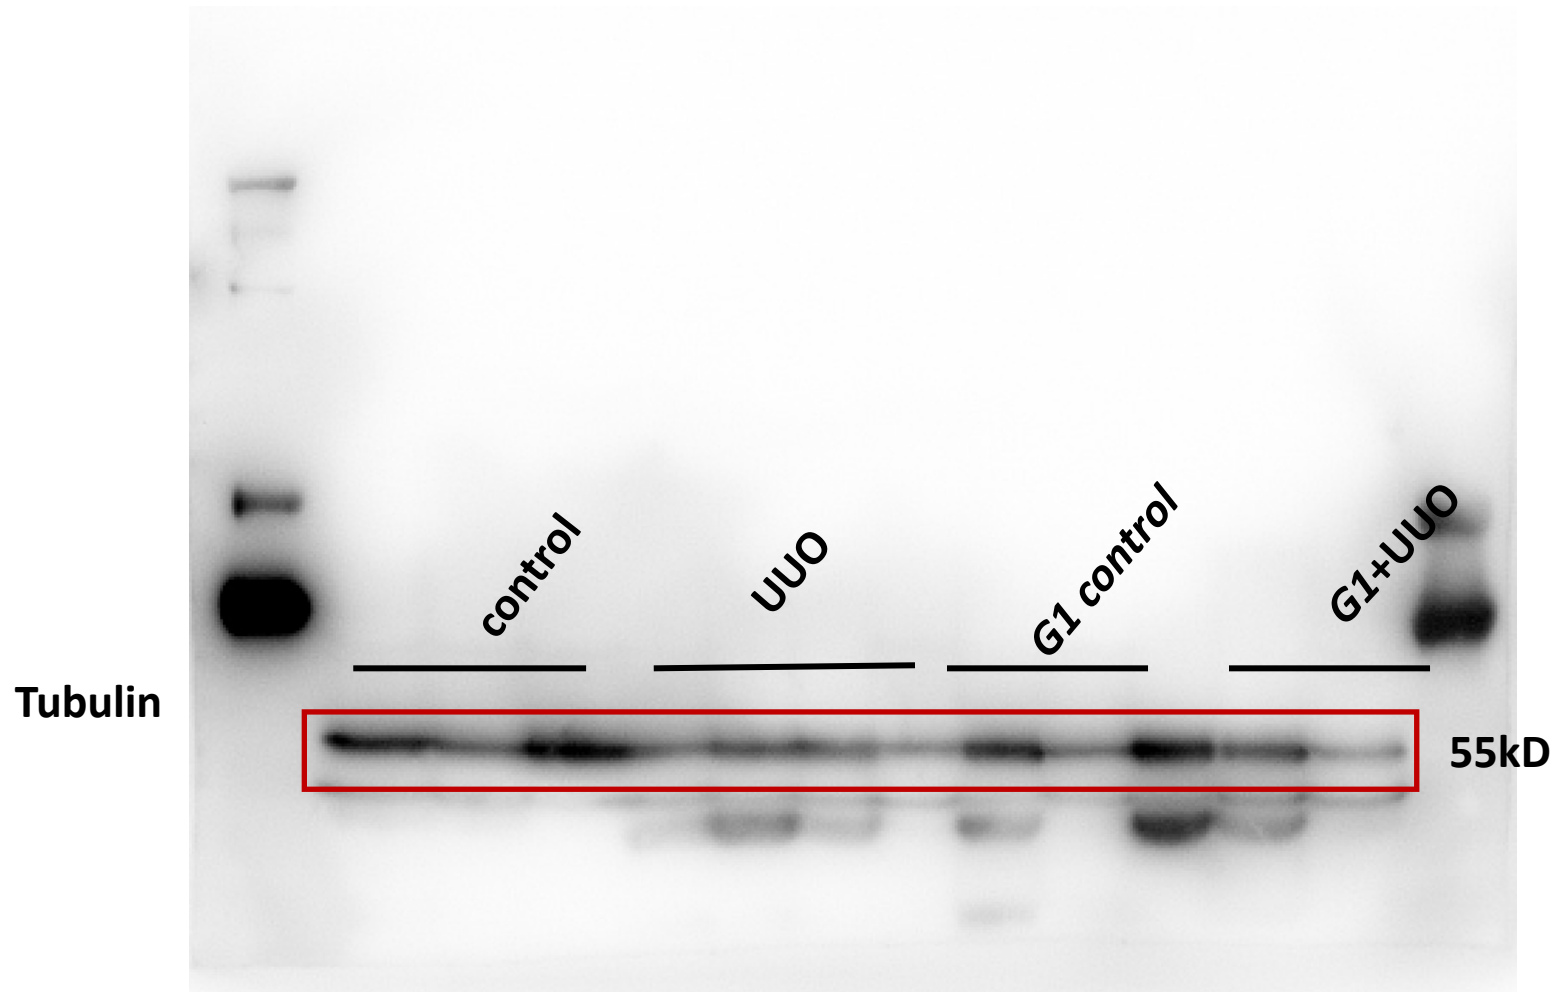

OVX female mice

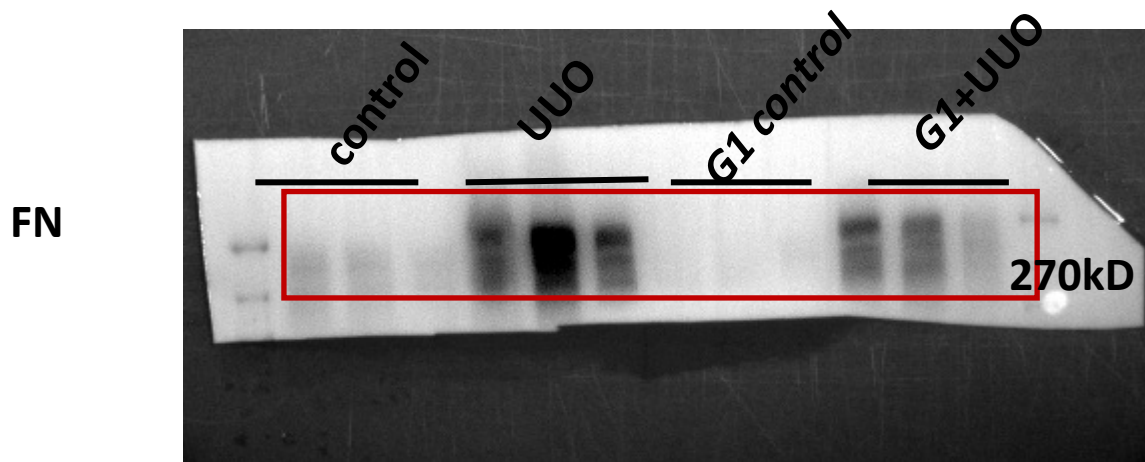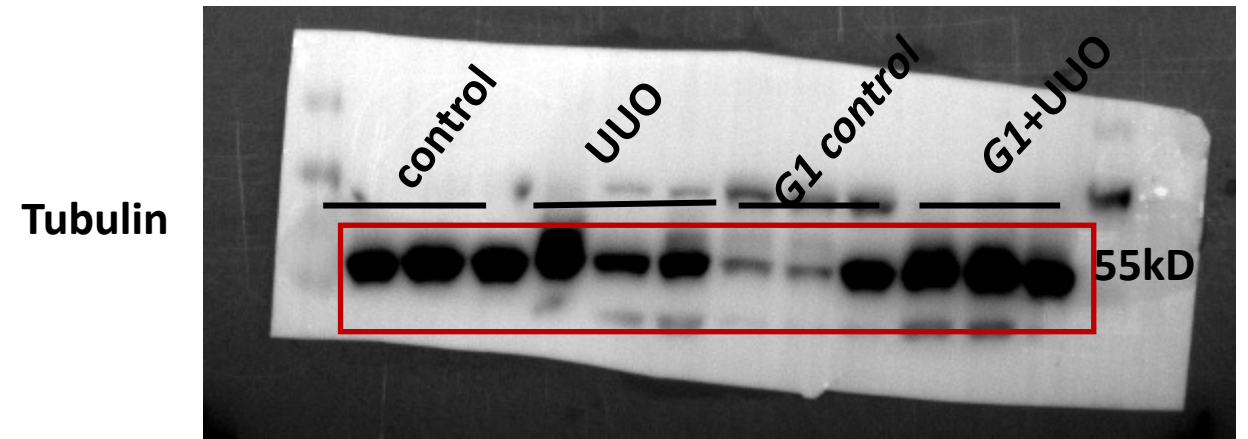

Male mice

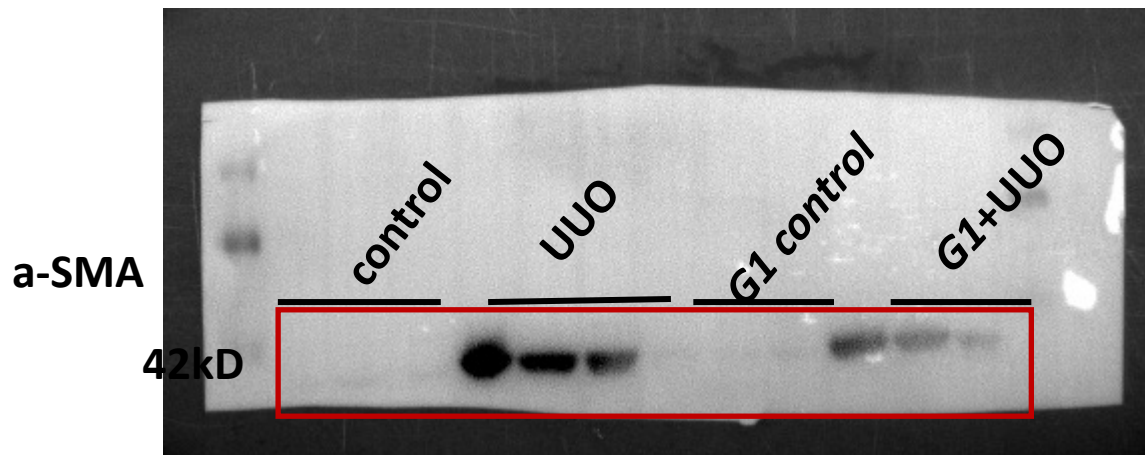

Tubulin

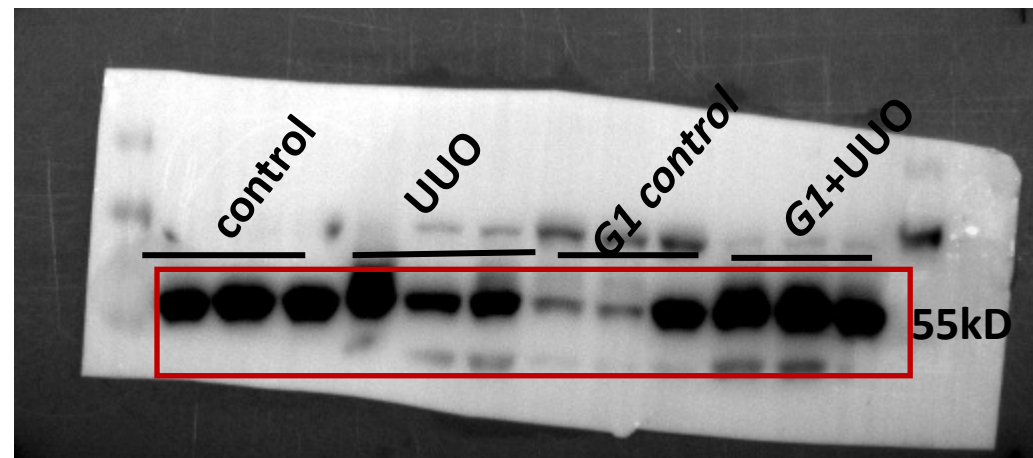

Male mice

a-SMA

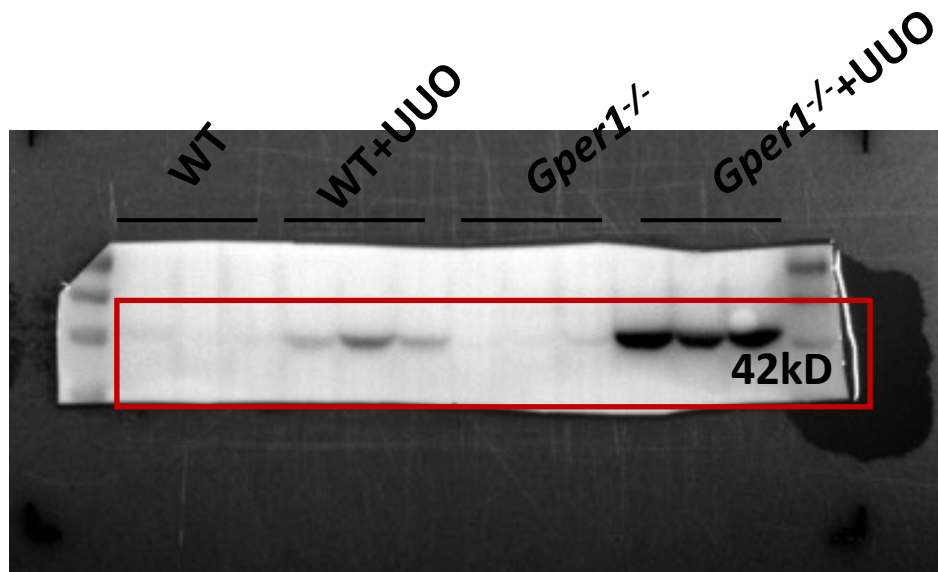

GAPDH

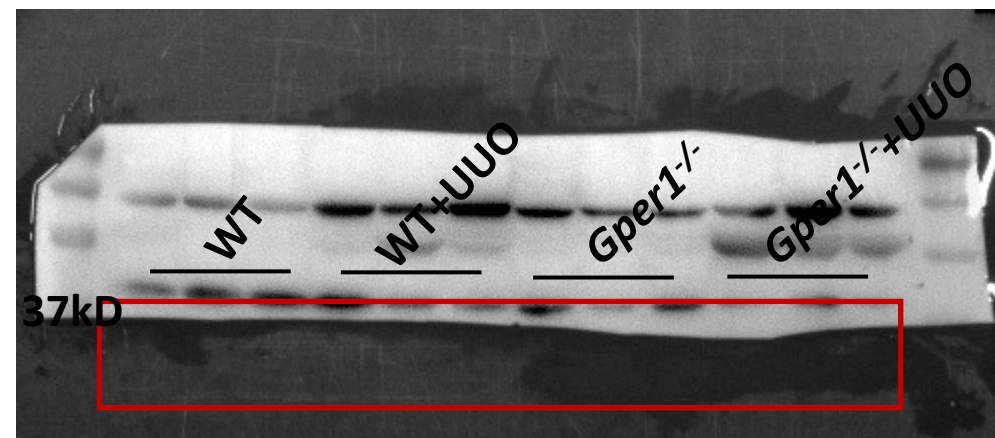

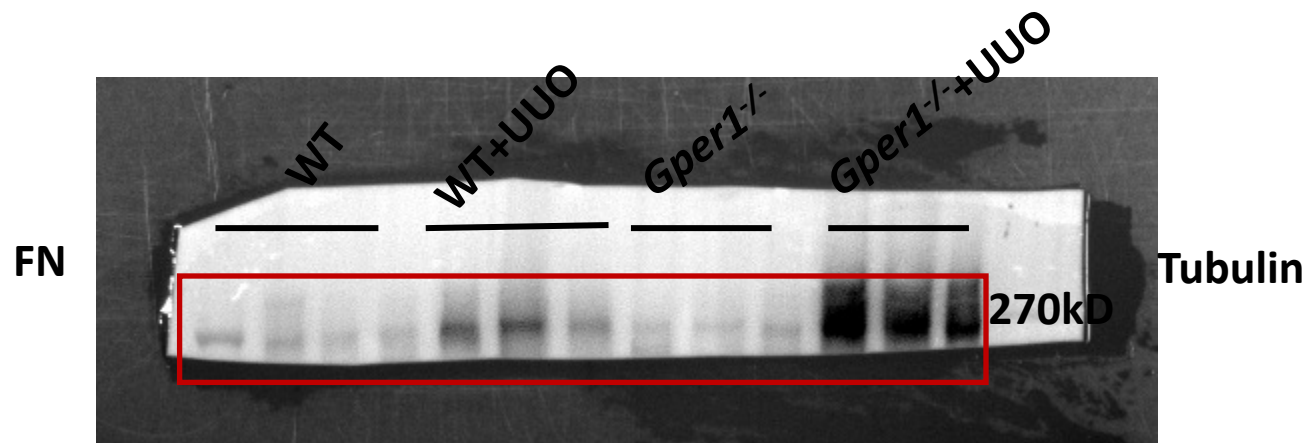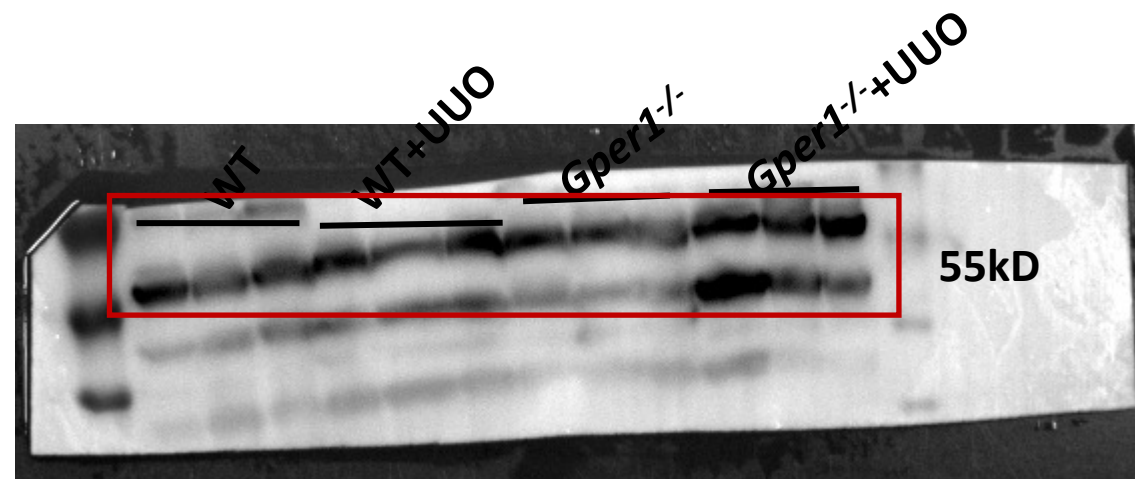

**Phospho**

**P38**

**38kD**

DMSO G-1 LPS/INF LPS/INF+G-1

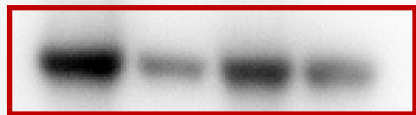

DMSO G-1 IL4 IL4+G-1

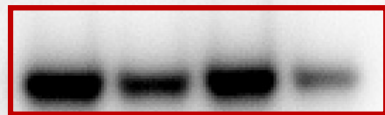

**Total**

**P38**

**38kD**

DMSO G-1 LPS/INF LPS/INF+G-1

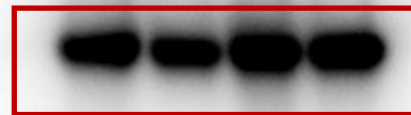

DMSO G-1 IL4 IL4+G-1

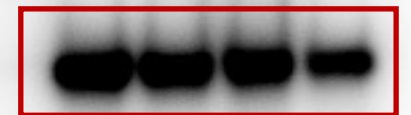



**Phospho-  
ERK  
44kD  
42kD**

DMSO G-1 LPS/INF LPS/INF+G-1

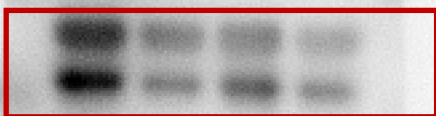

DMSO G-1 IL4 IL4+G-1

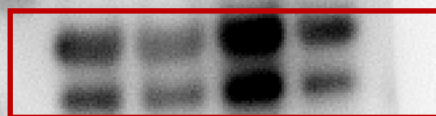

**Total  
ERK  
44kD  
42kD**

DMSO G-1 LPS/INF LPS/INF+G-1

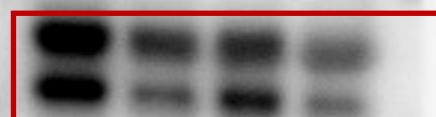

DMSO G-1 IL4 IL4+G-1

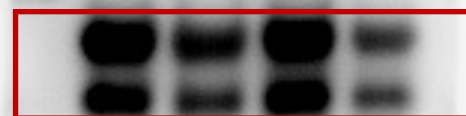



**Phospho  
JNK**

**54kD  
46kD**

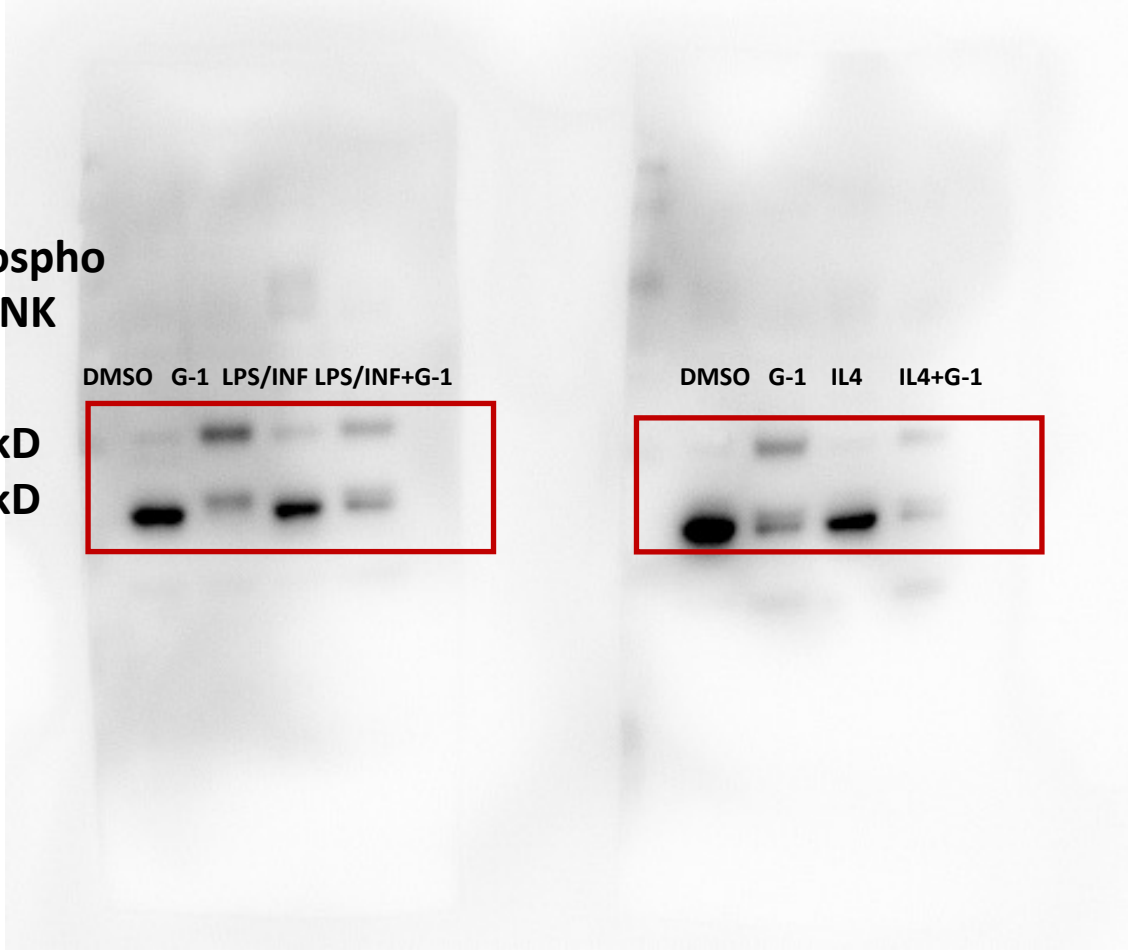

**Total  
JNK**

**54kD  
46kD**

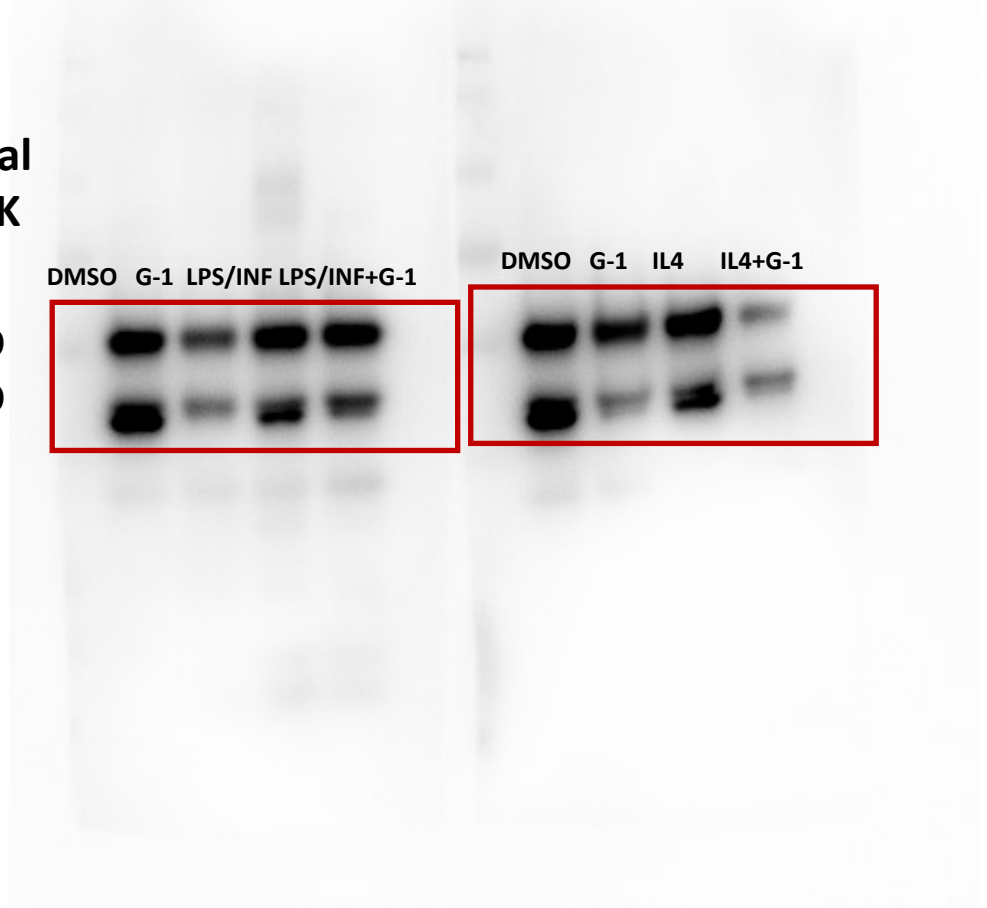

**Phospho  
AKT**

**60kD**

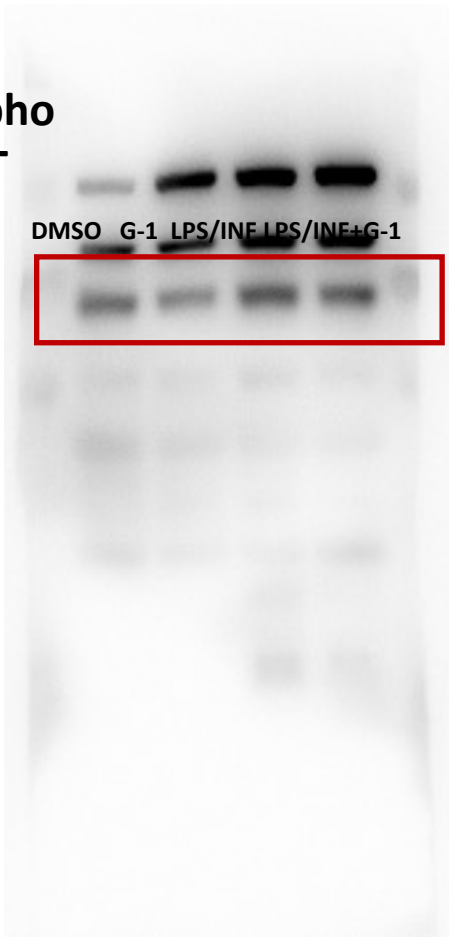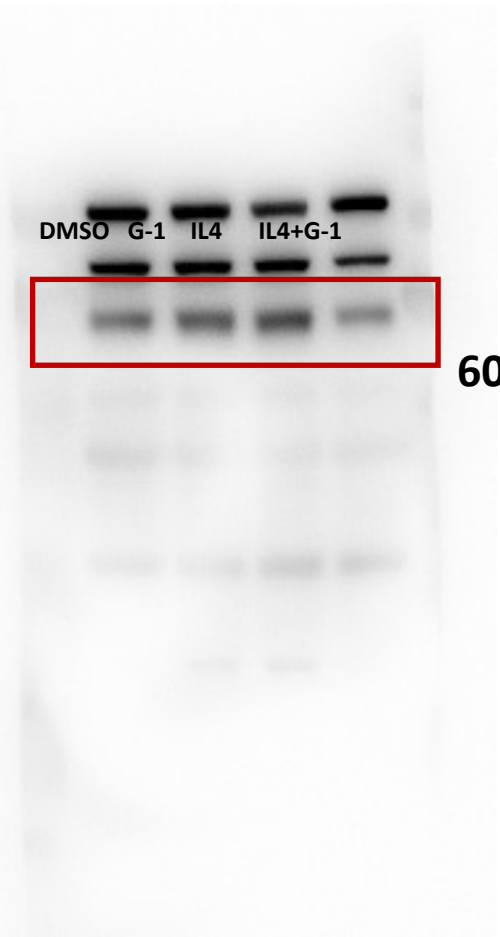

**Total  
AKT**

**60kD**

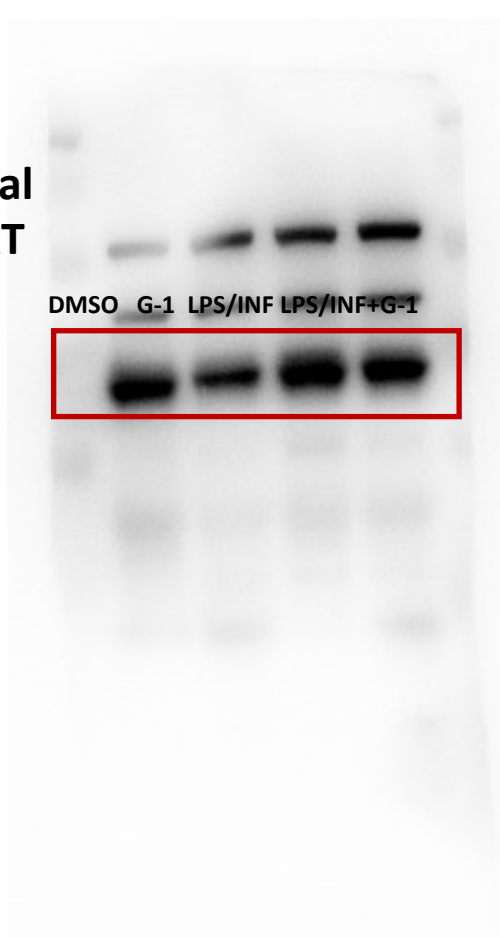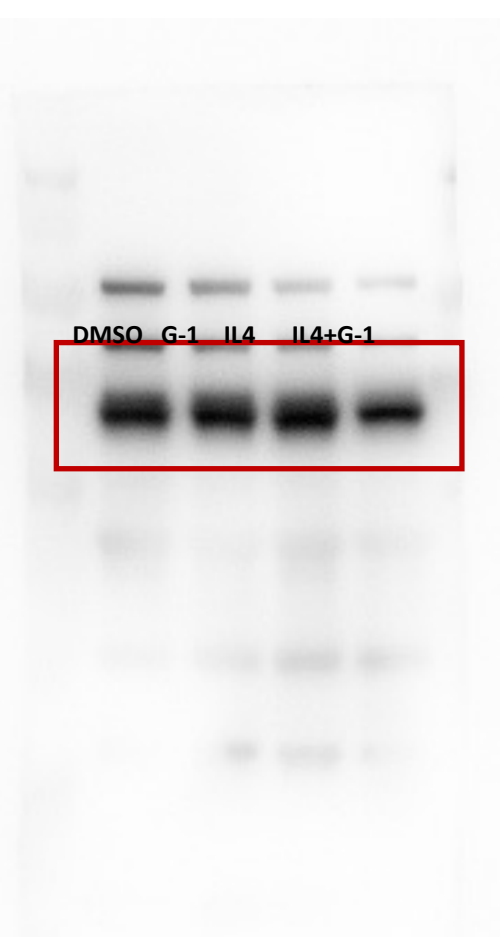

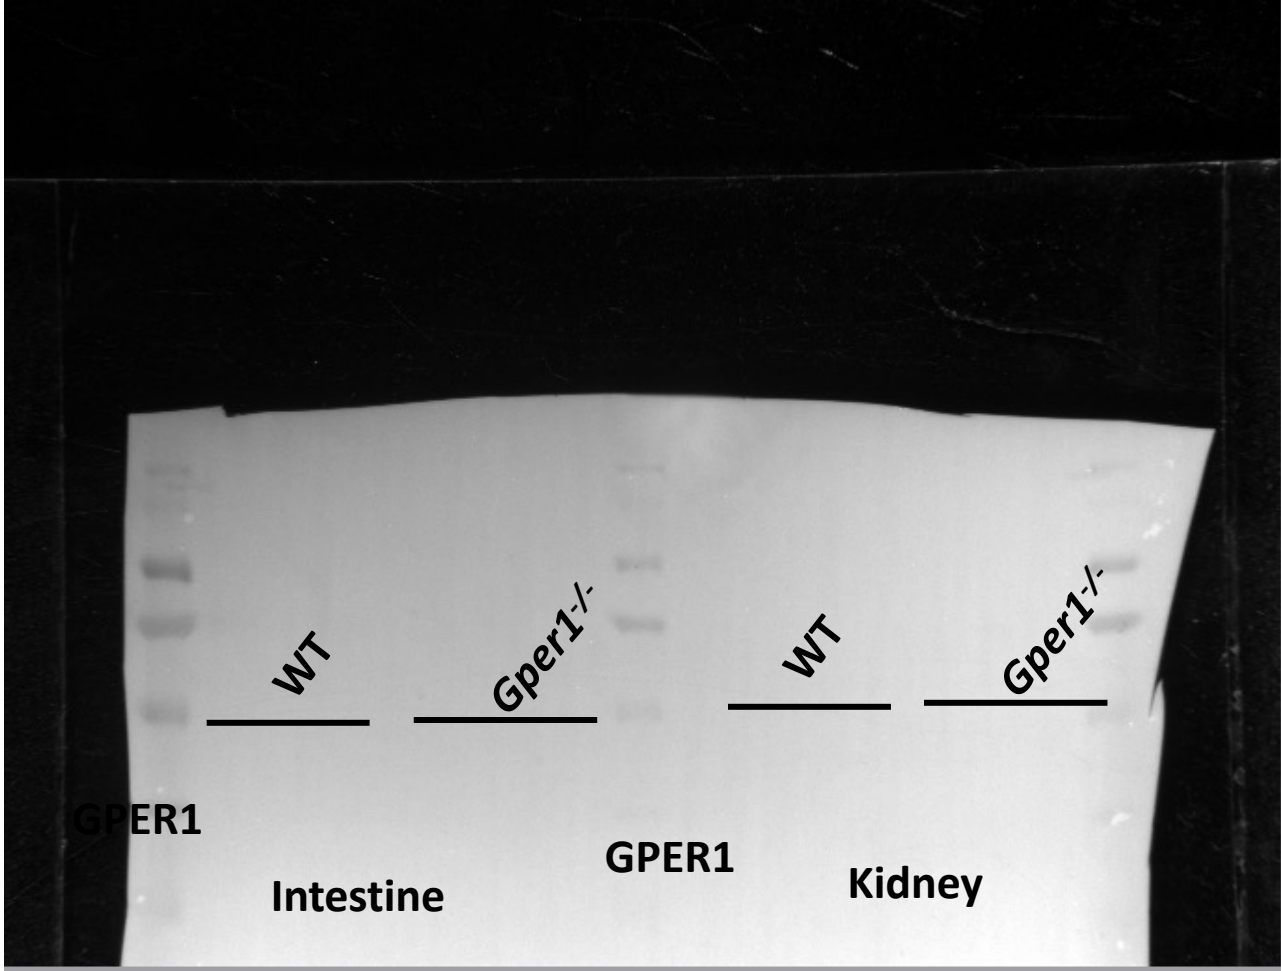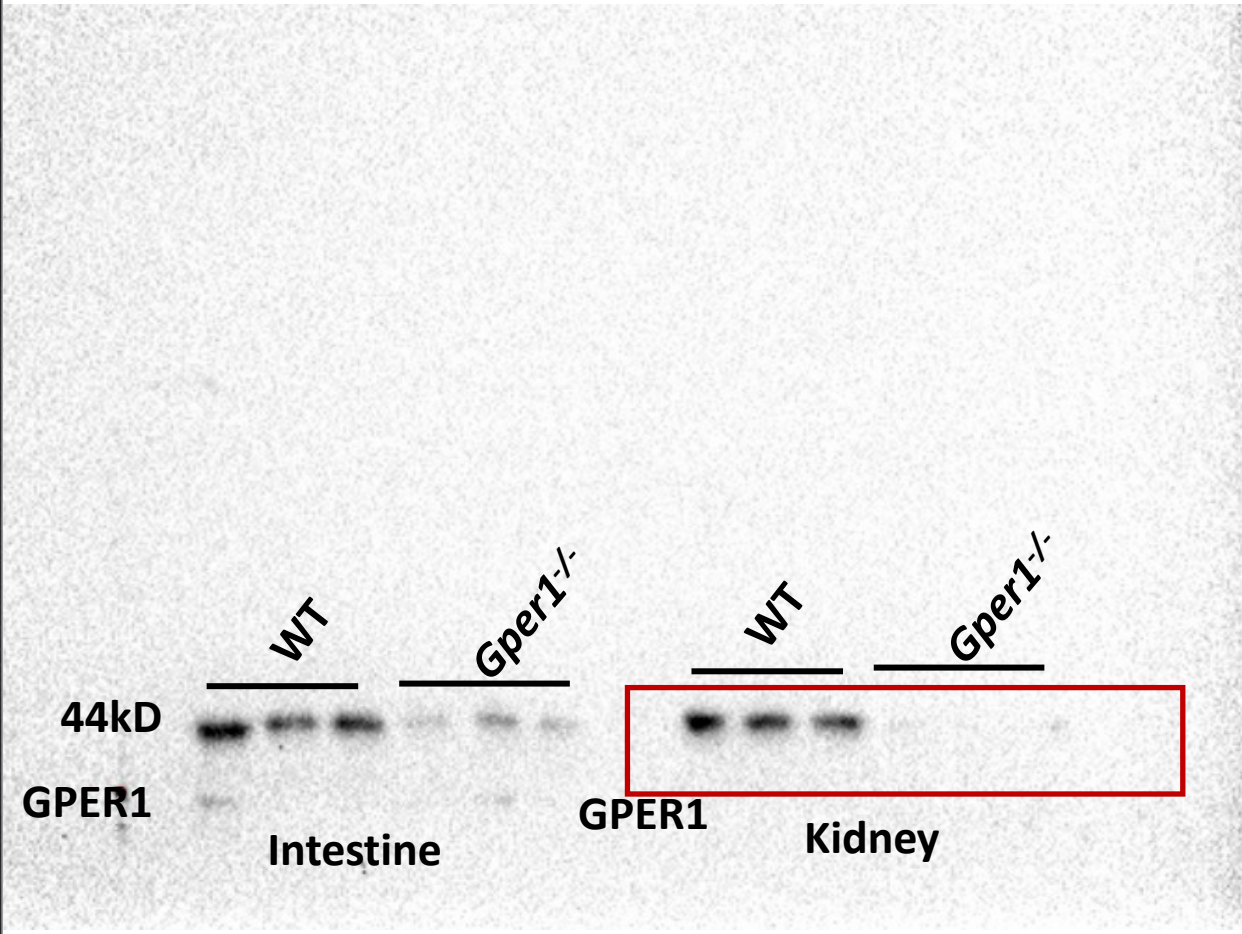

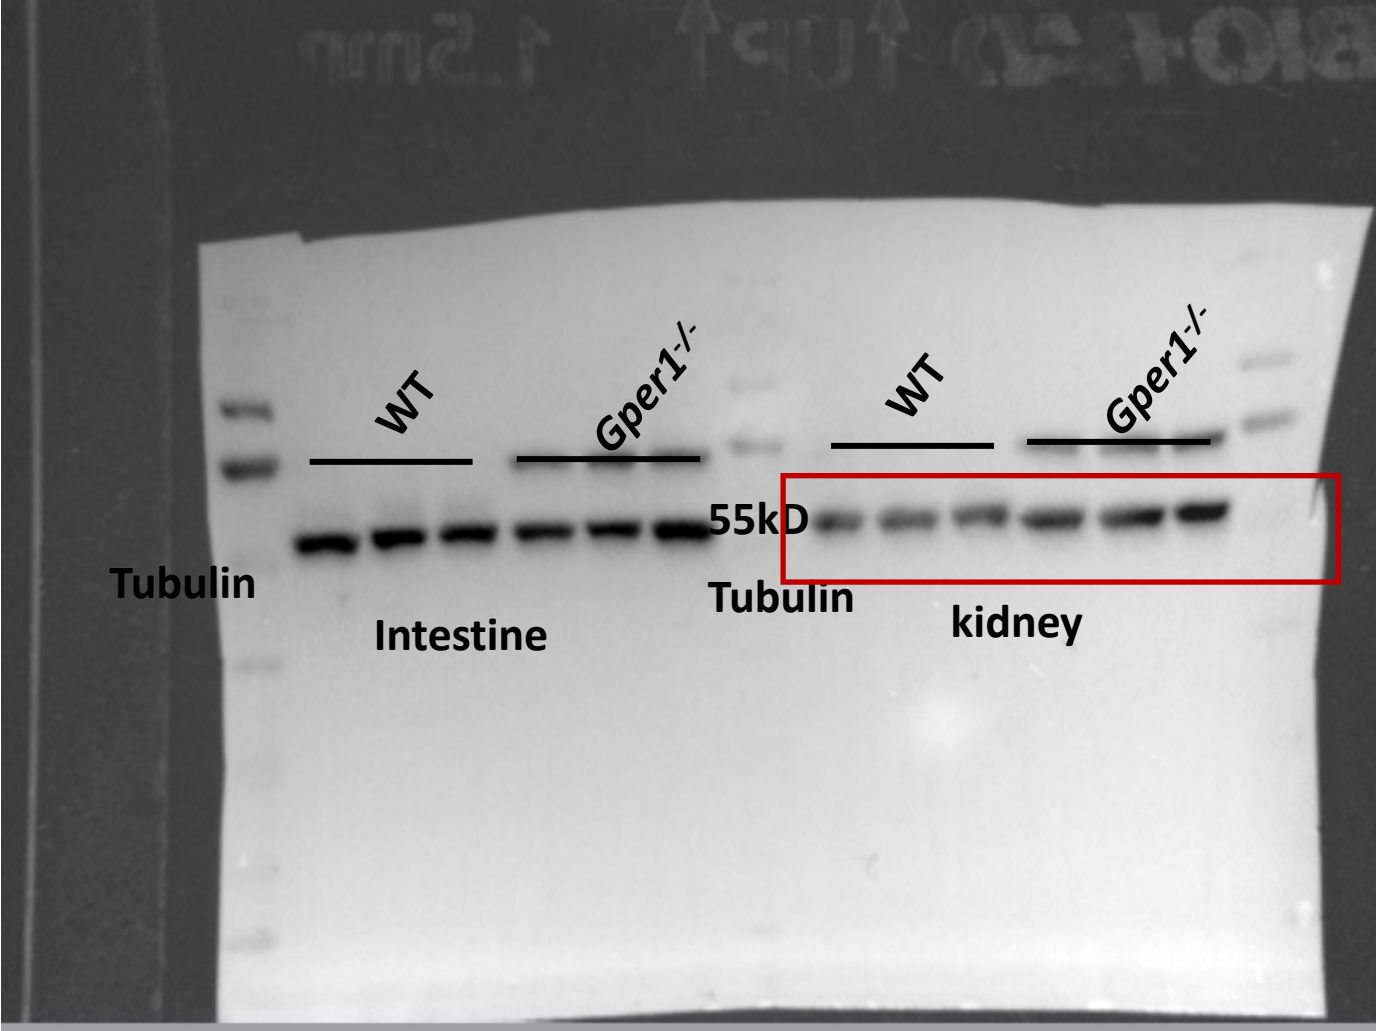

Supplement: 41419_2023_6338_MOESM2_ESM.pdf [file 41419_2023_6338_MOESM2_ESM.pdf]
